# Supplementary material
Source: PubMed Central journal article supplement (PMC3185108)

1 **ONLINE REPOSITORY**

2

3 **Identification of *ATPAF1* as a novel candidate gene for asthma in children**

4

5 Eric M. Schauberger<sup>1</sup>, Susan L. Ewart<sup>1</sup>, Syed H. Arshad<sup>2,3</sup>, Marianne Huebner<sup>1</sup>, Wilfried  
6 Karmaus<sup>4</sup>, John W. Holloway<sup>3</sup>, Karen H. Friderici<sup>1</sup>, Julie T. Ziegler<sup>5</sup>, Hongmei Zhang<sup>4</sup>, Mathew  
7 J. Rose-Zerilli<sup>3</sup>, Sheila J. Barton<sup>3</sup>, Stephen T. Holgate<sup>3</sup>, Jeffrey R. Kilpatrick<sup>6</sup>, John B. Harley<sup>6,7</sup>,  
8 Stephane Lajoie-Kadoch<sup>8</sup>, Isaac T. W. Harley<sup>8</sup>, Qutayba Hamid<sup>9</sup>, Ramesh J. Kurukulaaratchy<sup>2,3</sup>,  
9 Max A. Seibold<sup>10</sup>, Pedro C. Avila<sup>11</sup>, William Rodriguez-Citron<sup>12</sup>, Jose R. Rodriguez-Santana<sup>13</sup>,  
10 Donglei Hu<sup>14</sup>, Christopher Gignoux<sup>14</sup>, Isabelle Romieu<sup>15</sup>, Stephanie J. London<sup>16</sup>, Esteban G.  
11 Burchard<sup>14</sup>, Carl D. Langefeld<sup>5</sup>, and Marsha Wills-Karp<sup>8</sup>

12

13 <sup>1</sup>*Michigan State University, East Lansing, MI, USA*14 <sup>2</sup>*The David Hide Asthma and Allergy Research Centre, Isle of Wight, UK*15 <sup>3</sup>*University of Southampton School of Medicine, University of Southampton, Southampton, UK*16 <sup>4</sup>*University of South Carolina, Columbia, SC, USA*17 <sup>5</sup>*Wake Forest School of Medicine, Winston-Salem, NC, USA*18 <sup>6</sup>*JKA Genomics, Oklahoma City, OK, USA*19 <sup>7</sup>*Oklahoma Medical Research Foundation, Oklahoma City, OK, USA*20 <sup>8</sup>*Cincinnati Children's Hospital Medical Center, Cincinnati, OH, USA*21 <sup>9</sup>*Meakins-Christie Laboratory, McGill University, Montreal, Quebec, Canada*22 <sup>10</sup>*National Jewish Health, Denver, CO, USA*23 <sup>11</sup>*Northwestern University Feinberg School of Medicine, Chicago, IL, USA*

24 <sup>12</sup>*Veterans Affairs Medical Center, San Juan, PR*

25 <sup>13</sup>*Centro de Neumologia Pediatrica, CSP, San Juan, PR*

26 <sup>14</sup>*University of California, San Francisco, CA, USA*

27 <sup>15</sup>*National Institute of Public Health, Cuernavaca, MX*

28 <sup>16</sup>*National Institute of Environmental Health Sciences, National Institutes of Health, Department*  
29 *of Health and Human Services, Research Triangle Park, NC, USA*

30

31 **Corresponding author:** Dr. Susan Ewart, [ewart@cvm.msu.edu](mailto:ewart@cvm.msu.edu) , G100 Veterinary Medical  
32 Center, Michigan State University, East Lansing, MI, USA; Tel: (517) 884-2005; Fax: (517)  
33 432-2310

34

## 35 **METHODS**

36

### 37 *Study subjects*

38 **Isle of Wight birth cohort.**<sup>E1</sup> The primary population was a cohort of children (n=1,456) born  
39 and enrolled between January 1, 1989 and February 28, 1990, on the Isle of Wight, UK. Children  
40 were subsequently assessed at ages 1, 2, 4, and 10 years, with asthma diagnosis at each  
41 assessment based on a minimum criteria of physician diagnosed asthma plus wheeze in the  
42 previous 12 months, using a validated questionnaire.<sup>E2</sup> A subset of 112 children with asthma at  
43 age 10 years and a control group of 165 children without asthma or wheeze at any age was  
44 selected for genome-wide screening.

45

46 **Wessex families.**<sup>E3</sup> Caucasian families (n=341) containing at least two biological siblings aged  
47 5-21 years with a current physician's diagnosis of asthma and who were taking asthma  
48 medication on a regular basis were recruited from Wessex, UK. Asthma diagnosis was based on  
49 validated health survey questionnaires completed by each family member.<sup>E4</sup>

50

### 51 **Childhood Asthma Management Program (CAMP) project and Childhood Asthma**

52 **Research and Education (CARE) network case-parent trios.** The publically available  
53 SHARP data used (study accession: phs000166.v2.p1) were the case-parent trios from the CARE  
54 network<sup>E5, E6</sup> and the CAMP project.<sup>E5, E7, E8</sup> The CAMP study cases were children aged 5-12  
55 years who had chronic asthma with medication use and either asthma symptoms at least twice  
56 per week or at least two usages per week of an inhaled bronchodilator. The CARE study children  
57 were aged 6-17 years and had a positive asthma predicted index based on at least three

58 exacerbations of wheezing during the previous twelve months. The CARE population did not  
59 include the PEAK study of infants at risk.

60

61 **Genetics of Asthma in Latino Americans (GALA) case-parent trios.**<sup>E9</sup> The GALA Study  
62 includes children (probands) and their biological parents recruited from schools, clinics, and  
63 hospitals that cared for Latino patients at four sites: San Francisco Bay Area, New York City,  
64 Puerto Rico, and Mexico City. In all health care centers, medical records were reviewed to  
65 identify patients with physician-diagnosed mild or moderate-severe asthma based on medical  
66 billing records (ICD 9 codes). Patients were contacted to participate in the study if approved by  
67 their primary physician. Patients were assessed by interviews and questionnaires (available in  
68 English and Spanish) administered by bilingual and bicultural physicians specializing in asthma.  
69 Children were included in the study if they were between the ages of 8-40 with physician  
70 diagnosed mild to moderate-severe asthma and had experienced two or more symptoms  
71 (including wheezing, coughing and/or shortness of breath) in the previous two years at the time  
72 of recruitment. Trios were enrolled if both parents and 4 sets of grandparents of the proband self-  
73 identified as either Puerto Rican (395 trios) or Mexican (298 trios) ethnicity.

74

75 **Mexico Childhood Asthma Study case-parent trios.**<sup>E10-E12</sup> Asthmatic children aged 5-17 years  
76 and their parents were recruited from a population of patients at a referral clinic in central  
77 Mexico City, MX (n=492 trios). The diagnosis of asthma was based on clinical symptoms and  
78 response to treatment by pediatric allergists at a major referral hospital. The severity of asthma  
79 was rated by a pediatric allergist according to symptoms in the Global Initiative on Asthma  
80 schema as mild (intermittent or persistent), moderate, or severe.<sup>E13</sup>

81  
82 **Consortia controls.** Additional consortia controls were acquired from 1) the Wellcome Trust  
83 Case Control Consortium (WTCCC) (n=3,004), which derives from control subjects<sup>E14</sup> from the  
84 1958 British Birth Cohort and from blood donors recruited by the three national UK Blood  
85 Services, and 2) the Genetics of Systemic Lupus Erythematosus (SLEGEN) (n=3,471)  
86 containing females from UK and USA origins.<sup>E15</sup> The asthma status of the consortia controls was  
87 unknown.

88  
89 **Asthmatic subjects examined for gene expression.**<sup>E16, E17</sup> Eight patients with severe atopic  
90 asthma (mean age: 41, FEV<sub>1</sub><80% predicted, on oral or inhaled steroids), five with mild asthma  
91 (mean age: 40, FEV<sub>1</sub>>80% predicted, on bronchodilators only, all nonatopic except one), and  
92 four control subjects (mean age: 43, normal FEV<sub>1</sub> and PC<sub>20</sub>, all nonatopic) were recruited for  
93 bronchial biopsy and subsequent gene expression studies. All subjects were Caucasian  
94 nonsmokers from the Montreal area of Quebec, Canada.

95

### 96 *Genotyping and quality control*

97 **Isle of Wight pooled samples.** DNA samples assessed by NanoDrop spectrophotometry  
98 (Wilmington, DE, USA) to have A<sub>260</sub>/A<sub>280</sub> range of 1.65-2.0 and A<sub>260</sub>/A<sub>230</sub> range of 1.0-2.2  
99 qualified for inclusion in a pool. DNA samples were separated on 0.8% agarose gels to confirm  
100 lack of degradation or RNA contamination. Equimolar amounts of DNA from individuals were  
101 combined for a total of 250 ng/pool. DNA pools were digested with XbaI or HindIII enzyme,  
102 adapter ligated, and PCR amplified. Then samples were separated on 4% agarose gels to ensure

103 DNA fragmentation in the 100-300 bp range. PCR yields (>1,200 ng/μl accepted) were  
104 compared between microarray chips to ensure uniformity and PCR products were separated on  
105 2% agarose gels to ensure the proper range of product was amplified. Genotyping was conducted  
106 using the Affymetrix 100K GeneChip Mapping Array and GeneChip Genotyping software<sup>E18</sup>  
107 (v.4.0, Affymetrix, Inc.) was used for relative quality control assessment, detection rates  
108 (>98.5%), and allele distributions (<10% difference between pools). Hybridization intensity  
109 comparisons of the case and control pools were used to identify significant allele frequency  
110 differences for each SNP (Table E1).

111

112 **Isle of Wight individual samples.** To further investigate the top region associated with asthma  
113 (within 1p33-p32.31) tag SNPs in were chosen based on HapMap<sup>E19</sup> data (CEU Population,  
114 Release 21a/Phase II Jan 07, B35 data set) using Tagger<sup>E20</sup> and SNPbrowser software<sup>E21</sup>  
115 (Applied Biosystems) with a minor allele frequency threshold of 10% and pairwise R<sup>2</sup> threshold  
116 of 100%. SNPs with genotype and HapMap data available from the pooled sample analysis were  
117 also included. The selection list was scrutinized and haplotype groups were developed based on  
118 CEU phase data.<sup>E19</sup> A final list of tag SNPs was chosen from each group based on predicted  
119 assay design scores for the SNP beadarray. Individual sample (n=277) genotyping of SNPs was  
120 done by custom Illumina GoldenGate assays included a ThermoElectron KingFisher96  
121 automated magnetic bead wash. Haploview<sup>E22</sup> was used to examine Hardy-Weinberg equilibrium,  
122 minor allele frequencies, and linkage disequilibrium. The genotype success rate for each SNP was  
123 98.9% and the overall call rate was 99.7%. Five samples failed completely and were not reported  
124 here. Two samples assayed in duplicate as technical replicates had complete concordance. Eight  
125 samples from a different study genotyped here had a 99.8% call rate.

126

127 **Wessex samples.** DNA samples from the Wessex population were genotyped for selected SNPs  
128 using KASPar competitive allele-specific PCR (Kbiosciences, Herts, UK). Replication sample  
129 genotyping assays<sup>E23</sup> were designed and tested with a random panel of DNAs to ensure SNP  
130 polymorphism. The genotype success rate for each SNP was  $\geq 97.4\%$  and the overall call rate  
131 was 91%. Quality control measures included negative results for water controls, intra-plate  
132 testing of a known DNA, and clear, distinct result clusters.

133

134 **CAMP and CARE samples.**<sup>E5</sup> CAMP and CARE population DNA samples were genotyped  
135 using the Affymetrix 6.0 GeneChip Array. Quality control measures for markers included  
136 comparing minor allele frequencies of the Caucasian subjects to the HapMap CEU samples, call  
137 rates ( $>95\%$ ), Hardy-Weinberg equilibrium within Caucasian subjects ( $p < 10^{-6}$ ), and Mendelian  
138 errors ( $< 5$ ). In addition, examined was the proportion of missing data for each plate across all  
139 markers and the frequency differences across each plate using stringently quality controlled  
140 markers. Based on these criteria 83.5% of markers in the CAMP study and 81.3% of markers in  
141 the CARE study were retained. Quality control measures for samples included evaluation of  
142 missingness, Mendelian inconsistencies, F inbreeding statistic, X chromosome heterozygosity  
143 rates to check gender, allele sharing analysis, and population structure analysis. Meeting these  
144 criteria were 96.8% of CAMP samples and 97.2% of CARE samples.

145

146 **GALA samples.** Genotyping was performed on the Affymetrix 6.0 GeneChip Array containing  
147  $> 900K$  SNPs prior to QC measures. Subjects were filtered based on 95% call rates, complete  
148 trios, and Mendelian errors. Markers were filtered based on 95% call rates, Hardy-Weinberg

149 equilibrium p-values  $>10^{-6}$ ,  $<1\%$  Mendelian inconsistencies, unambiguous mapping to the  
150 human reference genome, and no evidence for previous plate effects. The total number of trios  
151 passing QC was 538 (n=1,614), and the total number of markers passing QC was 729,685. In  
152 addition to direct genotyping, genotypes at some SNPs were imputed in the GALA subjects with  
153 imputation performed using MACH<sup>E24</sup> using the phased CEU, YRI, and ASN phase 2, release 21  
154 consensus HapMap genotypes as a reference. Allele frequencies in transmitted and untransmitted  
155 chromosomes were estimated summing the dosages of the parents of complete trios, subtracting  
156 the dosages of the children, and then taking the average (i.e. untransmitted allele frequency).  
157 Family-based association statistics were calculated using allelic dosages assuming an additive  
158 model in PBAT version 6.4.0.<sup>E25</sup>

159

160 **Mexico Childhood Asthma Study samples.**<sup>E12</sup> Genotyping was performed using the Illumina  
161 HumanHap 550v3 BeadChip and genotypes determined by the Illumina BeadStudio Genotyping  
162 Module. Successful genotype call rates in 1,491 subjects exceeded 95% with an average call rate  
163 of 99.7%. Three trios were excluded because of a low call rate of 1 family member. Quality  
164 control analyses for the 561,466 SNPs in the GWAS scan were conducted by using PLINK.<sup>E26</sup>  
165 Sequential SNP exclusions were made due to poor chromosomal mapping (n=173), missing rate  
166 of greater than 5% (n=4125), minor allele frequency of less than 1% (n=16,949), a Hardy-  
167 Weinberg equilibrium p-value of less than  $1 \times 10^{-10}$  (n=557), Mendelian errors in more than 2  
168 families (n=4,945), and heterozygous genotype calls for chromosome X SNPs in more than 1  
169 male subject (n=380). SNPs with 1 or more discordant genotypes across 14 HapMap replicate  
170 samples identified by using the Genotyping Library and Utilities application<sup>E27</sup> were also  
171 excluded (n=921). Quality control at the subject level included inspection for unusual autosomal



172 homozygosity, inconsistent sex between genotype and collected phenotype data, and subject  
173 relatedness. There were 492 complete case-parent trios in the final data set.

174

175 **WTCCC samples.**<sup>E14</sup> Genome-wide association study of 14,000 cases of seven common  
176 diseases and 3,000 shared controls). Genotyping was conducted using the Affymetrix GeneChip  
177 500K array. A genotype calling algorithm, CIAMO, was developed and applied to the whole  
178 project. Successful samples were those with a call rate of 93% at  $p=0.33$  for each array, over  
179 90% concordance for the 50 SNPs that are common to the two arrays, both arrays agreed on  
180 gender, and showed over 70% identity to the Sequenom genotypes supplied by WTCCC.

181

182 **SLEGEN samples.**<sup>E15</sup> Genotyping was conducted using the Illumina HapMap300 array. The  
183 265,648 (84%) SNPs that met the following criteria were used in the data analysis: 1) no  
184 statistically significant differences in the proportions of missing genotype data between cases and  
185 controls ( $p>0.05$ ), 2) overall  $<5\%$  missing genotype data, 3) Hardy-Weinberg equilibrium in  
186 controls  $p>0.01$ , and in cases  $p>0.0001$ , and 4) allele frequencies of controls statistically  
187 consistent with expectations for ethnicity matched HapMap samples ( $p>0.01$ ). Genotype data  
188 were only used from samples with a call rate greater than 90% (all samples), from SNPs with a  
189 call frequency greater than 90% (removed 27 SNPs), and an Illumina GenTrain score greater  
190 than 0.7 (removed 152 SNPs). Samples identity was verified in 91 SNPs that had been  
191 previously genotyped on 42% of the samples. At least one sample previously genotyped was  
192 randomly placed on each array and used to track samples throughout the genotyping process.

193

194 *Statistical analyses*

195 **Pooled samples.** Allele frequencies for Affymetrix data were determined by a structured  
196 analysis for pooled samples<sup>E28</sup> from Isle of Wight subjects.  $Z^2$  p-values were used to rank SNPs.  
197 An autoclustering algorithm was used on all SNPs. Clusters of SNPs were manually inspected  
198 when they had low call rate (<98.5%), low clustering score (<0.6), or significant departure from  
199 Hardy-Weinberg equilibrium ( $p < 0.05$ ). A total of 38 of the 96 clusters were edited to adjust the  
200 autoclustering algorithm. A cluster analysis of  $Z^2$  statistics was performed. Cluster parameters of  
201 size, SNP numbers, and level of significance were considered with preference given to small  
202 clusters of high significance. A subset of these clusters was assayed by individual genotyping.

203

204 **Haplotypes.** Odds ratios for haplotypes for Isle of Wight and Wessex data were computed using  
205 regression models. Conditional probabilities of subjects' compatible haplotype pairs were used  
206 given the observed marker phenotypes and an estimate of haplotype frequencies.<sup>E29</sup> Haploview  
207 was used to generate linkage disequilibrium plots for the populations.<sup>E22</sup>

208

209 **Consortia controls.** The use of consortia controls has the benefit of mitigating the concern of  
210 lack of statistical power while remaining efficient.<sup>E8, E15</sup> Power analysis performed using  
211 simulations with and without the inclusion of 3,000 external controls, and assuming a  
212 misclassification rate of 15%, demonstrated testing powers increased at least 20%. Consortia  
213 control data from SLEGEN and WTCCC were independently combined with Isle of Wight control  
214 data. Several SNPs in common with the Isle of Wight SNPs had been directly genotyped in the  
215 SLEGEN and WTCCC control populations. In addition, a high degree of linkage disequilibrium  
216 in this region allowed imputation to infer additional genotypes using BimBam software<sup>E30</sup> and  
217 CEU Hapmap build 36. Results of analysis from the variants that were directly genotyped were

218 found to be similar to those of imputed genotypes (for example, rs2218189 had a p-value=0.00010  
219 from direct genotyping and p=0.00011 from genotype imputation). Hardy Weinberg equilibrium  
220 was calculated for both WTCCC and SLEGEM. SNPGEN<sup>E15</sup> software with an additive model  
221 using a Cochran-Armitage trend test was used to determine statistical significance in combined Isle  
222 of Wight and consortia data.

223

#### 224 *ATPAF1 expression in biopsied bronchial tissue*

225 Gene expression studies were conducted on bronchial biopsy samples collected from 13  
226 asthmatic and 4 control subjects. Endoscopic biopsies were obtained using 3.5 mm cup forceps  
227 from the lower lobe of the right lung and stored in the Tissue Bank (MCI/Meakins-Christie  
228 Tissue Bank, McGill University, Montreal, Quebec, Canada).<sup>E16, E17</sup> Tissue RNA was extracted  
229 using the RNeasy micro kit extraction columns (Qiagen, Valencia, CA). Total RNA was reverse  
230 transcribed with oligo(dT) (Amersham Pharmacia Biotech, Pittsburgh, PA) and Superscript II  
231 (Invitrogen, Carlsbad, CA) in the presence of RNAGuard (Amersham Pharmacia Biotech,  
232 Pittsburgh, PA). *ATPAF1* levels were normalized using ribosomal protein S9 gene expression.  
233 Primers spanned at least one intron. Primer sequences: *ATPAF1*.sense 5'-  
234 AAGTGGAGTTCAGTACCTGTCCA-3'; *ATPAF1*.antisense 5'-  
235 GGCTCAGTCCTGTCCAACA-3'; S9.sense 5'-TGCTGACGCTTGATGAGAAG-3';  
236 S9.antisense 5'-CGCAGAGAGAAGTCGATGTG-3'. No template controls and standard curves  
237 were run for each gene. The standard curves contained four standards ranging from 5K to 50M  
238 copies for ribosomal protein S9 and 1 to 10K copies for *ATPAF1*. Test samples were run in  
239 singlet (due to paucity of sample amounts) and all test samples measured within the standard  
240 curve values. Expression data were analyzed with Kruskal-Wallis followed by Dunn's multiple

241 comparison tests using GraphPad Prism (v.4.0, GraphPad Software, San Diego, CA,  
242 <http://www.graphpad.com>).

243

244 **REFERENCES FOR ONLINE REPOSITORY**

- 245 E1. Kurukulaaratchy RJ, Fenn MH, Waterhouse LM, Matthews SM, Holgate ST, Arshad  
246 SH. Characterization of wheezing phenotypes in the first 10 years of life. *Clin Exper Allergy*  
247 2003; 33:573-578.
- 248 E2. The international study of asthma and allergies in childhood (ISAAC) steering committee.  
249 Worldwide variation in prevalence of symptoms of asthma, allergic rhinoconjunctivitis, and  
250 atopic eczema: ISAAC. *Lancet* 1998; 351:1225-1232.
- 251 E3. Van Eerdedewegh P, Little RD, Dupuis J, Del Mastro RG, Falls K, Simon J, Torrey D,  
252 Pandit S, McKenny J, Braunschweiler K, et al. Association of the ADAM33 gene with  
253 asthma and bronchial hyperresponsiveness. *Nature* 2002; 418:426-430.
- 254 E4. Beghe B, Barton S, Rorke S, Peng Q, Sayers I, Gaunt T, et al. Polymorphisms in the  
255 interleukin-4 and interleukin-4 receptor alpha chain genes confer susceptibility to asthma and  
256 atopy in a Caucasian population. *Clin Exper Allergy* 2003; 33:1111-1117.
- 257 E5. The database of Genotypes and Phenotypes (dbGaP), National Center for Biotechnology  
258 Information, U. S. National Library of Medicine. From <http://www.ncbi.nlm.nih.gov/gap>
- 259 E6. Guilbert TW, Morgan WJ, Krawiec M, Lemanske RF, Jr., Sorkness C, Szeffler SJ, et al. The  
260 Prevention of Early Asthma in Kids study: design, rationale and methods for the Childhood  
261 Asthma Research and Education network. *Control Clin Trials* 2004; 25:286-310.
- 262 E7. The Childhood Asthma Management Program Research Group. Long-term effects of  
263 budesonide or nedocromil in children with asthma. *N Engl J Med* 2000; 343:1054-63.
- 264 E8. Himes BE, Hunninghake GM, Baurley JW, Rafaels NM, Sleiman P, Strachan DP, et al.  
265 Genome-wide association analysis identifies PDE4D as an asthma-susceptibility gene. *Am J*  
266 *Hum Genet* 2009; 84:581-93.
- 267 E9. Burchard EG, Avila PC, Nazario S, Casal J, Torres A, Rodriguez-Santana JR, et al. Lower  
268 bronchodilator responsiveness in Puerto Rican than in Mexican subjects with asthma. *Am J*  
269 *Respir Crit Care Med* 2004; 169:386-392.
- 270 E10. David GL, Romieu I, Sienna-Monge JJ, Collins WJ, Ramirez-Aguilar M, del Rio-Navarro  
271 BE, et al. Nicotinamide adenine dinucleotide (phosphate) reduced:quinine oxidoreductase and  
272 glutathione S-transferase M1 polymorphisms and childhood asthma. *Am J Respir Crit Care Med*  
273 2003; 168:1199-204.
- 274 E11. Hancock DB, Romieu I, Shi M, Sienna-Monge JJ, Wu H, Chiu GY, et al. Genome-wide  
275 association study implicates chromosome 9q21.31 as a susceptibility locus for asthma in  
276 Mexican children. *PLoS Genet* 2009; 5:e1000623.
- 277 E12. Wu H, Romieu I, Shi M, Hancock DB, Li H, Sienna-Monge JJ, et al. Evaluation of  
278 candidate genes in a genome-wide association study of childhood asthma in Mexicans. *J Allergy*  
279 *Clin Immunol* 2010; 125:321-7.
- 280 E13. National Heart, Lung and Blood Institute (NHLBI). Global Initiative for Asthma (GINA).  
281 Bethesda: National Institutes of Health; 1998.
- 282 E14. The Wellcome Trust Case Control Consortium. Genome-wide association study of 14,000  
283 cases of seven common diseases and 3,000 shared controls. *Nature* 2007; 447:661-78.
- 284 E15. Harley JB, Alarcon-Riquelme ME, Criswell LA, Jacob CO, Kimberly RP, Moser KL, et al.  
285 Genome-wide association scan in women with systemic lupus erythematosus identifies  
286 susceptibility variants in ITGAM, PXX, KIAA1542 and other loci. *Nat Genet* 2008; 40:204-10.

- 287 E16. Foley SC, Mogas AK, Olivenstein R, Fiset PO, Chakir J, Bourbeau J, et al. Increased  
288 expression of ADAM33 and ADAM8 with disease progression in asthma. *Journal of Allergy and*  
289 *Clinical Immunology* 2007; 119:863-71.
- 290 E17. Shannon J, Ernst P, Yamauchi Y, Olivenstein R, Lemiere C, Foley S, et al. Differences in  
291 airway cytokine profile in severe asthma compared to moderate asthma. *Chest* 2008; 133(2):420-  
292 06.
- 293 E18. Affymetrix. Genechip® genotyping analysis software (gtype). 2007. Available  
294 from: <http://www.affymetrix.com/products/software/specific/gtype.affx>.
- 295 E19. Gibbs RA, Belmont JW, Hardenbol P, Willis TD, Yu FL, Yang HM, Ch'ang LY, Huang  
296 W, Liu B, Shen Y, et al. The International HapMap project. *Nature* 2003; 426:789-796.
- 297 E20. de Bakker PIW, Yelensky R, Pe'er I, Gabriel SB, Daly MJ, Altshuler D. Efficiency and  
298 power in genetic association studies. *Nature Genet* 2005; 37:1217-1223.
- 299 E21. De La Vega FM, Isaac HI, Scafe CR. A tool for selecting SNPs for association  
300 studies based on observed linkage disequilibrium patterns. *Pac Symp Biocomput*  
301 2006: 487-498.
- 302 E22. Barrett JC, Fry B, Maller J, Daly MJ. Haploview: analysis and visualization of LD and  
303 haplotype maps. *Bioinformatics* 2005; 21:263-5.
- 304 E23. KBiosciences. December 2008. Available from: <http://www.kbioscience.co.uk>.
- 305 E24. Li Y, Abecasis GR. Mach 1.0: Rapid haplotype reconstruction and missing genotype  
306 inference. *Am J Hum Genet* 2006; S79, 2290.
- 307 E25. Lange C, DeMeo D, Silverman EK, Weiss ST, Laird NM. PBAT: tools for family-based  
308 association studies. *Am J Hum Genet* 2004; 74, 367-369.
- 309 E26. Purcell S, Neale B, Todd-Brown K, Thomas L, Ferreira MAR, Bender D, et al. PLINK: A  
310 tool set for whole-genome association and population-based linkage analyses. *American Journal*  
311 *of Human Genetics* 2007; 81:559-75.
- 312 E27. Thomas G, Jacobs KB, Yeager M, Kraft P, Wacholder S, Orr N, et al. Multiple loci  
313 identified in a genome-wide association study of prostate cancer, *Nat Genet* 2008; 40:310-315.
- 314 E28. Yang HC, Pan CC, Lu RCY, Fann CSJ. New adjustment factors and sample size  
315 calculation in a DNA-pooling experiment with preferential amplification. *Genetics* 2005;  
316 169:399-410.
- 317 E29. Lake SL, Lyon H, Tantisira K, Silverman EK, Weiss ST, Laird NM, Schaid DJ. Estimation  
318 and tests of haplotype-environment interaction when linkage phase is ambiguous. *Human*  
319 *Heredity* 2003; 55:56-65.
- 320 E30. Scheet P, Stephens M. A fast and flexible statistical model for large-scale population  
321 genotype data: applications to inferring missing genotypes and haplotypic phase. *Am J Hum*  
322 *Genet* 2006; 78:629-44.

323

324

325

326 **FIGURES**

327

328 Figure E1. Manhattan plot of pooled DNA samples from the Isle of Wight population. False  
329 discovery rates at 1% and 5% levels are indicated.

330

331

332

333 Figure E2. Linkage disequilibrium plots of the asthma-associated region within chromosome  
334 1p33-p32.31 created using Haploview with HapMap release 28 data from a) CEU, b) ASW, and  
335 c) MEX populations. Shown within the blocks are  $D'$  values. Color scheme:  $LOD \geq 2$  is shades of  
336 pink/bright red;  $LOD < 2$  and  $D' = 1$  is blue;  $LOD < 2$  and  $D' = 1$  is white.

337

338

339



## TABLES

Table E1. Allele frequencies of pooled DNA samples from Isle of Wight children for chromosome 1p33-p32.31 SNPs

| SNP                        | Gene Symbol           | Function | Chr 1 Position (1p33) <sup>a</sup> | Asthma case pools allele frequencies |        |        |        |        | Control pools allele frequencies |        |        |         |        |
|----------------------------|-----------------------|----------|------------------------------------|--------------------------------------|--------|--------|--------|--------|----------------------------------|--------|--------|---------|--------|
|                            |                       |          |                                    | Pool 1                               | Pool 2 | Pool 3 | Pool 4 | Pool 5 | Pool 1                           | Pool 2 | Pool 3 | Pool 4  | Pool 5 |
|                            |                       |          |                                    | (n=)22                               | 22     | 22     | 23     | 23     | 30                               | 30     | 30     | 37      | 37     |
| <a href="#">rs10489769</a> | <a href="#">NSUN4</a> | intron   | 46579290                           | 0.6420                               | 0.7993 | 0.7197 | 0.7024 | 0.7838 | 0.7270                           | 0.7063 | 0.7518 | 0.7207  | 0.5701 |
| rs10489770                 | NSUN4                 | intron   | 46580184                           | 0.8257                               | 0.7575 | 0.7486 | 0.7392 | 0.7932 | 0.7171                           | 0.7689 | 0.7657 | 0.7935  | 0.8664 |
| rs952947                   |                       |          | 46775476                           | 0.4367                               | 0.2237 | 0.2047 | 0.1818 | 0.2178 | 0.3001                           | 0.2314 | 0.1345 | 0.2302  | 0.3294 |
| rs6429606                  | MKNK1                 | intron   | 46835487                           | 0.2234                               | 0.3420 | 0.1412 | 0.3280 | 0.1262 | 0.2157                           | 0.2963 | 0.2675 | 0.3562  | 0.2460 |
| rs2181412 *                |                       |          | 46869234                           | 0                                    | 0      | 0      | 0      | 0      | 0                                | 0      | 0      | 0       | 0      |
| rs1273237                  | ATPAF1                | intron   | 46881838                           | 0.0448                               | 0.0424 | 0.0598 | 0.0602 | 0.0703 | 0.0587                           | 0.0511 | 0.0544 | 0.05281 | 0.0428 |
| rs1933932 *                | ATPAF1                | intron   | 46881915                           | 0                                    | 0      | 0      | 0      | 0      | 0                                | 0      | 0      | 0       | 0      |
| rs631840                   | ATPAF1                | intron   | 46890531                           | 0.9200                               | 0.9814 | 0.8965 | 0.9383 | 0.9190 | 0.9673                           | 0.8722 | 0.8923 | 0.9619  | 1      |
| rs620913                   | ATPAF1                | intron   | 46890654                           | 0.7079                               | 0.5701 | 0.6649 | 0.5749 | 0.5804 | 0.5336                           | 0.6313 | 0.5064 | 0.4793  | 0.5575 |
| rs2289447                  | ATPAF1                | intron   | 46890755                           | 0.9687                               | 0.8312 | 0.9200 | 0.9572 | 0.7297 | 0.7406                           | 0.5777 | 0.5698 | 0.7613  | 0.6743 |
| rs1150068                  | ATPAF1                | intron   | 46891505                           | 0.8052                               | 0.7078 | 0.7063 | 0.7954 | 0.7390 | 0.6758                           | 0.5765 | 0.6872 | 0.5871  | 0.6484 |
| rs1048380                  | KIAA0494              | 3' UTR   | 46915125                           | 0.7311                               | 0.6892 | 0.8251 | 0.8247 | 0.7328 | 0.5972                           | 0.6946 | 0.6976 | 0.6471  | 0.4893 |
| rs2275380                  | KIAA0494              | intron   | 46920315                           | 0.6085                               | 0.3971 | 0.3791 | 0.3331 | 0.4137 | 0.4742                           | 0.5673 | 0.4467 | 0.5134  | 0.6321 |
| rs1150064                  | KIAA0494              | intron   | 46920631                           | 0.2289                               | 0.2785 | 0.2795 | 0.2225 | 0.3083 | 0.3510                           | 0.3950 | 0.3940 | 0.3588  | 0.3820 |
| rs1440487                  | KIAA0494              | intron   | 46939662                           | 0.5558                               | 0.8685 | 0.7766 | 0.7421 | 0.7529 | 0.7595                           | 0.6417 | 0.8989 | 0.6548  | 0.7247 |
| rs1440486                  | KIAA0494              | intron   | 46939825                           | 0.0978                               | 0.1980 | 0.1797 | 0.1516 | 0.2480 | 0.2223                           | 0.4916 | 0.3963 | 0.1678  | 0.4513 |
| rs720413                   |                       |          | 46992410                           | 0.4851                               | 0.5188 | 0.4154 | 0.4916 | 0.4403 | 0.3361                           | 0.5404 | 0.3456 | 0.3830  | 0.4244 |
| rs10493124 *               |                       |          | 47002322                           | 0                                    | 0      | 0      | 0      | 0      | 0                                | 0      | 0      | 0       | 0      |
| rs2405335                  | CYP4B1                | intron   | 47044772                           | 0.2694                               | 0.2939 | 0.2428 | 0.1290 | 0.4212 | 0.2575                           | 0.2504 | 0.2810 | 0.2048  | 0.2174 |
| rs10493125                 |                       |          | 47098257                           | 0.2501                               | 0.0897 | 0.1155 | 0.1670 | 0.1197 | 0.0618                           | 0.1615 | 0.1982 | 0.2231  | 0.1577 |
| rs1002378                  | CYP4Z1                | intron   | 47317899                           | 0.4859                               | 0.4587 | 0.4463 | 0.5505 | 0.3939 | 0.4959                           | 0.4471 | 0.4640 | 0.4226  | 0.4388 |
| rs2405340                  | CYP4Z1                | intron   | 47322106                           | 0.5046                               | 0.5179 | 0.4573 | 0.6875 | 0.5523 | 0.2817                           | 0.3415 | 0.5722 | 0.5372  | 0.5261 |
| rs1343294                  | CYP4A22               | intron   | 47377339                           | 0.8217                               | 0.7462 | 0.8115 | 0.8748 | 0.5377 | 0.6459                           | 0.7217 | 0.7635 | 0.8552  | 0.8008 |

<sup>a</sup>Position information from HapMap Data Rel 28 PhaseII+III, August 10, on NCBI B36 assembly, dbSNP b126

\*SNPs monomorphic in HapMap CEU population; n = number of DNA samples per pool

Table E2. Alleles, frequencies, and odds ratios in the Isle of Wight

|           | Isle of Wight <sup>a</sup> |             |            |            |          |          |
|-----------|----------------------------|-------------|------------|------------|----------|----------|
| SNP       | Minor Allele               | Control MAF | Asthma MAF | Odds Ratio | Lower CI | Upper CI |
| rs1258000 | G                          | 0.296       | 0.215      | 0.520      | 0.330    | 0.820    |
| rs2289447 | T                          | 0.255       | 0.168      | 0.470      | 0.290    | 0.780    |
| rs620431  | A                          | 0.283       | 0.179      | 0.490      | 0.310    | 0.780    |
| rs1150068 | C                          | 0.269       | 0.173      | 0.450      | 0.270    | 0.730    |
| rs1048380 | T                          | 0.265       | 0.168      | 0.440      | 0.270    | 0.730    |
| rs2275380 | G                          | 0.509       | 0.421      | 0.780      | 0.550    | 1.110    |
| rs1150064 | T                          | 0.269       | 0.173      | 0.460      | 0.280    | 0.750    |
| rs1440487 | T                          | 0.233       | 0.243      | 1.320      | 0.880    | 1.980    |
| rs1440486 | A                          | 0.265       | 0.173      | 0.460      | 0.280    | 0.750    |
| rs2218189 | G                          | 0.269       | 0.175      | 0.460      | 0.280    | 0.750    |
| rs6670495 | A                          | 0.250       | 0.154      | 0.490      | 0.290    | 0.810    |

<sup>a</sup>Data are from individually genotyped samples

MAF=Minor allele frequency

CI=Confidence interval

Table E3. Genetic associations for asthma in the Isle of Wight plus consortia control populations

|                     |            |           | Primary population                  |                            | Primary plus consortia control populations |                                       |
|---------------------|------------|-----------|-------------------------------------|----------------------------|--------------------------------------------|---------------------------------------|
|                     |            |           | IOW pooled GWAS                     | Individual IOW samples     | IOW individual + SLEGEN                    | IOW individual + WTCCC                |
| Genotyping platform |            |           | Affymetrix 100K GeneChip array      | Custom Illumina Goldengate | Illumina HumanHap300                       | Affymetrix 500K GeneChip array        |
| Model               |            |           | Allelic                             | Additive                   | Additive                                   | Additive                              |
| Software            |            |           | LatteThunder                        | SNPGWA                     | SNPGWA                                     | SNPGWA                                |
| Statistical test    |            |           | Z <sup>2</sup> p-value <sup>a</sup> | Cochran Armitage p-value   | Cochran-Armitage p-value <sup>b</sup>      | Cochran-Armitage p-value <sup>b</sup> |
| SNP                 | SLEGEN MAF | WTCCC MAF |                                     |                            |                                            |                                       |
| rs1258000           | 0.296      | 0.296     | -                                   | 0.0282                     | 0.0024 (0.0024)                            | (0.2090)                              |
| rs2289447           | 0.255      | 0.255     | 2.20x10 <sup>-8</sup>               | 0.0156                     | (0.0001)                                   | (0.0070)                              |
| rs620431            | 0.283      | 0.281     | -                                   | 0.0091                     | (0.0004)                                   | (0.0104)                              |
| rs1150068           | 0.269      | 0.270     | 0.0034                              | 0.0065                     | (0.0002)                                   | (0.0068)                              |
| rs1048380           | 0.265      | 0.267     | 0.0006                              | 0.0044                     | (0.0001)                                   | (0.0067)                              |
| rs2275380           | 0.509      | 0.492     | 0.0124                              | 0.0612                     | 0.0171 (0.01708)                           | 0.0587 (0.0573)                       |
| rs1150064           | 0.269      | 0.267     | 0.0053                              | 0.0084                     | (8.79x10 <sup>-5</sup> )                   | (0.0066)                              |
| rs1440487           | 0.233      | 0.237     | 0.4309                              | 0.7177                     | 0.2167 (0.1878)                            | 0.7623 (0.7025)                       |
| rs1440486           | 0.265      | 0.265     | 2.26x10 <sup>-5</sup>               | 0.0095                     | (0.0002)                                   | (0.0105)                              |
| rs2218189           | 0.269      | 0.270     | -                                   | 0.0060                     | 0.0001 (0.0001)                            | (0.0077)                              |
| rs6670495           | 0.250      | 0.252     | -                                   | 0.0060                     | (7.93x10 <sup>-6</sup> )                   | (0.0009)                              |

<sup>a</sup>False discovery rate cut-off for  $\alpha=0.05$  is Z<sup>2</sup> p-value=2.27x10<sup>-5</sup>

<sup>b</sup>p-values from imputed data indicated in parentheses

Table E4. Results of sliding-window haplotype association in CAMP and CARE family studies

| Race <sup>a</sup> | 1-marker   |           | 2-marker   |            |           | 3-marker   |            |            |           |
|-------------------|------------|-----------|------------|------------|-----------|------------|------------|------------|-----------|
|                   | SNP        | p-value   | SNP 1      | SNP 2      | p-value   | SNP 1      | SNP 2      | SNP 3      | p-value   |
| Caucasian         | rs1933932  | 0.08326   | rs1933932  | rs2486161  | 0.04505   | rs1933932  | rs2486161  | rs12087698 | 0.06802   |
|                   | rs12087698 | 0.3173    | rs12087698 | rs629412   | 0.04214   | rs12087698 | rs629412   | rs11211334 | 0.05825   |
|                   | rs629412   | 0.03389   | rs629412   | rs11211334 | 0.04265   | rs629412   | rs11211334 | rs631368   | 0.07071   |
|                   | rs682000   | 1         | rs682000   | rs654509   | 0.01141   | rs682000   | rs654509   | rs12094663 | 0.3342    |
|                   | rs654509   | 0.01141   | rs654509   | rs12094663 | 0.3342    | rs654509   | rs12094663 | rs1025806  | 0.5159    |
| African American  | rs12048954 | 0.04953   | rs12048954 | rs7412469  | 0.1993    | rs7412469  | rs2275380  | rs1890473  | 0.2376    |
|                   | rs7412469  | 0.4458    | rs7412469  | rs2275380  | 0.2712    | rs2275380  | rs1890473  | rs6665021  | 0.03613   |
|                   | rs3766217  | 0.4458    | rs3766217  | rs6671124  | 0.02204   | rs6671124  | rs1440487  | rs12026027 | 0.02562   |
|                   | rs6671124  | 0.006485  | rs6671124  | rs1440487  | 0.02482   | rs1440487  | rs12026027 | rs11801744 | 0.3445    |
|                   | rs11582403 | 0.2568    | rs11582403 | rs614078   | 0.03207   | rs614078   | rs720413   | rs6662321  | 0.5853    |
| Other ethnicity   | rs11582403 | 0.03251   | rs11582403 | rs614078   | 0.08669   | rs11582403 | rs614078   | rs720413   | 0.09493   |
|                   | rs614078   | 0.8575    | rs614078   | rs720413   | 0.3376    | rs614078   | rs720413   | rs6662321  | 0.01219   |
|                   | rs720413   | 0.715     | rs720413   | rs6662321  | 0.01195   | rs720413   | rs6662321  | rs17102513 | 0.02249   |
|                   | rs6662321  | 0.0009111 | rs6662321  | rs17102513 | 0.0008954 | rs6662321  | rs17102513 | rs11211355 | 0.0008954 |

<sup>a</sup>No significant results were found in the Hispanic families

75 SNPs through the region were tested; only SNPs with an asthma-associated haplotype are shown

Table E5. Asthma severity in the Isle of Wight population

| <b>Asthma Severity Classifications<sup>a</sup></b>                                     | <b>Severity Scores</b> | <b>Number (n) of individuals</b> |
|----------------------------------------------------------------------------------------|------------------------|----------------------------------|
| No treatment                                                                           | 0                      | 9                                |
| Mild intermittent: bronchodilator only                                                 | 1                      | 28                               |
| Mild persistent: one regular prophylactic medication                                   | 2                      | 41                               |
| Moderate persistent: multiple prophylactic medications and/or multiple steroid courses | 3                      | 23                               |
| Severe: multiple asthma emergency attendance or admissions                             | 4                      | 11                               |

<sup>a</sup>Classifications based on the Global Initiative for Asthma (GINA) 2007 report

Table E6. Alleles and frequencies in the replication populations

| SNP        | Wessex       |       | CAMP + CARE  |          |                  |          |              |          |                 |          | GALA <sup>a</sup> |         |         | Mexico Childhood Asthma Study |       |
|------------|--------------|-------|--------------|----------|------------------|----------|--------------|----------|-----------------|----------|-------------------|---------|---------|-------------------------------|-------|
|            | Caucasian    |       | Caucasian    |          | African American |          | Hispanic     |          | Other ethnicity |          | Minor Allele      | PR      | Mexican | Mexican                       |       |
|            | Minor Allele | MAF   | Minor allele | Case MAF | Minor allele     | Case MAF | Minor allele | Case MAF | Minor allele    | Case MAF | Minor Allele      | MAF     | MAF     | Minor Allele                  | MAF   |
| rs1258000  | G            | 0.285 |              |          |                  |          |              |          |                 |          |                   |         |         | G                             | 0.427 |
| rs2289447  | T            | 0.244 |              |          |                  |          |              |          |                 |          | T                 | (0.269) | (0.291) |                               |       |
| rs620431   | A            | 0.257 |              |          |                  |          |              |          |                 |          |                   |         |         |                               |       |
| rs1150068  | C            | 0.259 |              |          |                  |          |              |          |                 |          | C                 | (0.484) | (0.498) |                               |       |
| rs629412   |              |       | G            | 0.010    | G                | 0.345    | G            | 0.063    | G               | 0.163    |                   |         |         |                               |       |
| rs654509   |              |       | A            | 0.008    | A                | 0.024    | A            | 0.006    | A               | 0.028    |                   |         |         |                               |       |
| rs601060   |              |       | G            | 0.213    | G                | 0.193    | G            | 0.121    | G               | 0.152    | G                 | 0.161   | 0.129   |                               |       |
| rs1048380  | T            | 0.253 |              |          |                  |          |              |          |                 |          | G                 | (0.326) | (0.357) |                               |       |
| rs12048954 |              |       | C            | 0.538    | C                | 0.188    | C            | 0.495    | C               | 0.386    | T                 | 0.341   | 0.363   |                               |       |
| rs2275380  | A            | 0.487 | A            | 0.544    | A                | 0.244    | A            | 0.500    | A               | 0.413    | A                 | 0.346   | 0.373   | A                             | 0.428 |
| rs1150064  | T            | 0.258 |              |          |                  |          |              |          |                 |          | T                 | (0.474) | (0.474) |                               |       |
| rs6665021  |              |       | G            | 0.002    | G                | 0.012    | G            | 0        | G               | 0.022    | G                 | (0.002) | (0.002) |                               |       |
| rs4660956  |              |       | T            | 0.218    | T                | 0.052    | T            | 0.121    | T               | 0.098    | T                 | 0.142   | 0.118   |                               |       |
| rs6671124  |              |       | C            | 0.243    | C                | 0.568    | C            | 0.379    | C               | 0.446    | C                 | 0.489   | 0.499   |                               |       |
| rs1440487  | T            | 0.253 | T            | 0.213    | T                | 0.184    | T            | 0.121    | T               | 0.141    | T                 | 0.158   | 0.127   | T                             | 0.080 |
| rs1440486  | A            | 0.251 |              |          |                  |          |              |          |                 |          | A                 | (0.323) | (0.359) |                               |       |
| rs10749863 |              |       | G            | 0.211    | G                | 0.170    | G            | 0.121    | G               | 0.141    | G                 | 0.158   | 0.127   |                               |       |
| rs2218189  | G            | 0.257 |              |          |                  |          |              |          |                 |          | A                 | (0.419) | (0.440) | G                             | 0.428 |
| rs6670495  | A            | 0.24  |              |          |                  |          |              |          |                 |          | A                 | (0.458) | (0.467) |                               |       |
| rs11582403 |              |       | G            | 0.084    | G                | 0.227    | G            | 0.084    | G               | 0.109    | G                 | 0.121   | 0.099   |                               |       |
| rs6662321  |              |       | T            | 0.056    | T                | 0.301    | T            | 0.053    | T               | 0.076    | T                 | (0.101) | (0.088) |                               |       |

<sup>a</sup>Data in parentheses were imputed

Minor alleles reported are per NCBI Entrez SNP convention

### ASTHMA

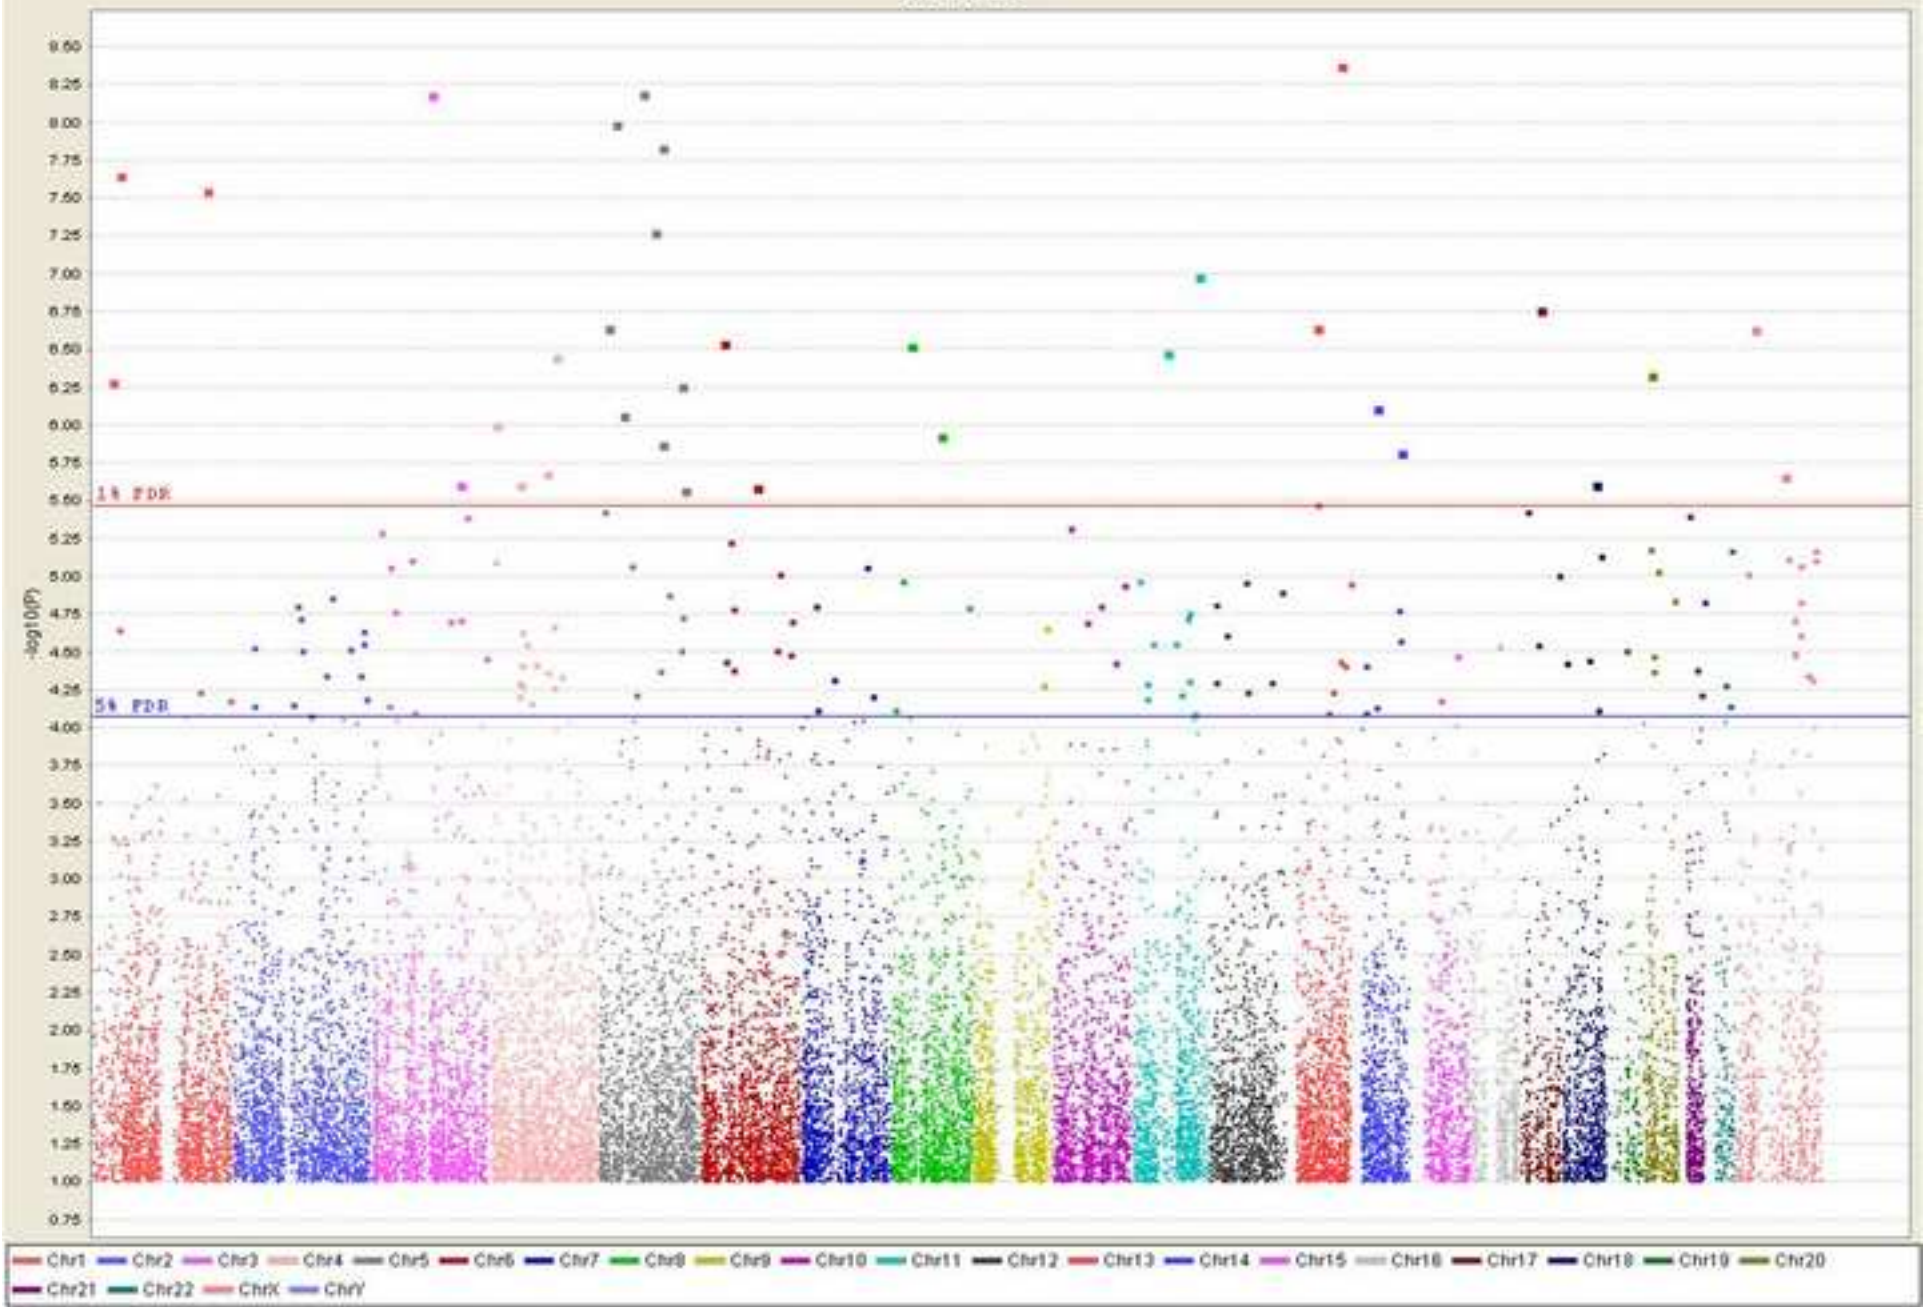

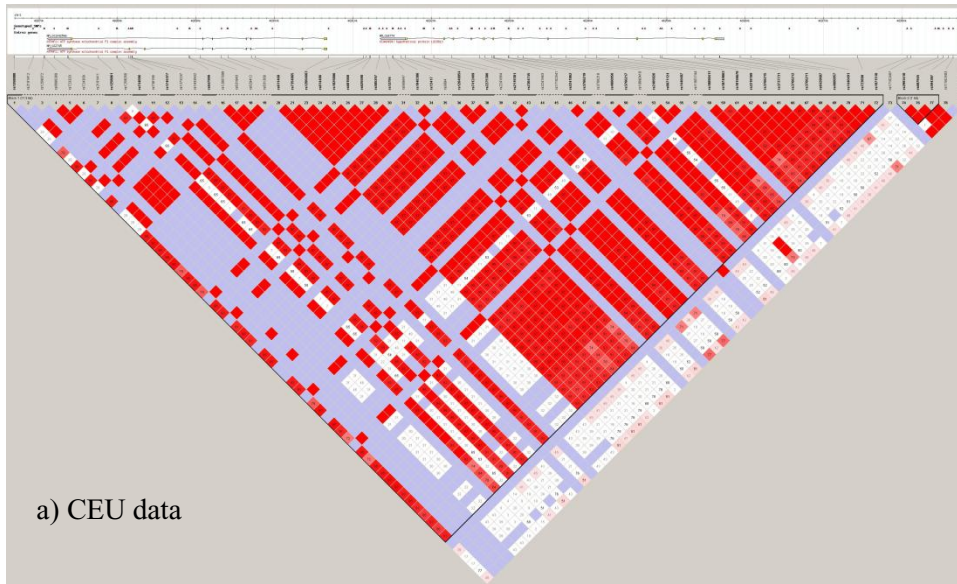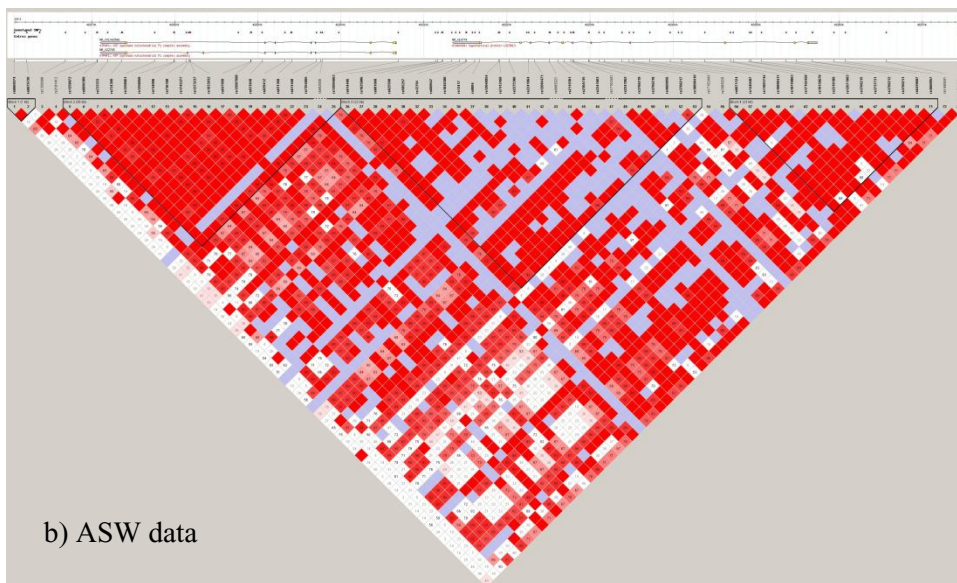



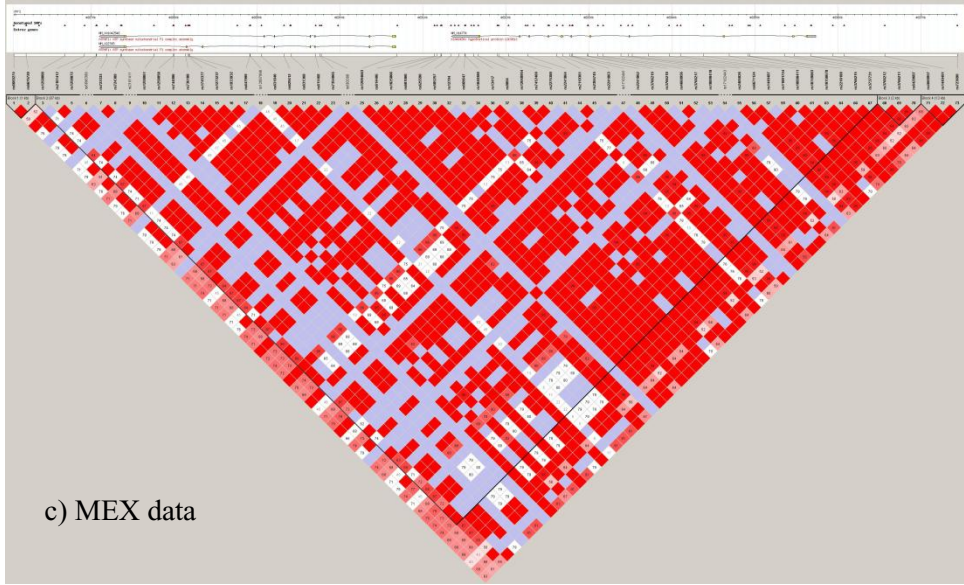

Supplement: NIHMS308543-supplement-supplement_1.pdf [file NIHMS308543-supplement-supplement_1.pdf]
